# Supplementary material for: Nanoplatforms for Irinotecan Delivery Based on Mesoporous Silica Modified with a Natural Polysaccharide
Source: MDPI journal article supplement (doi:10.3390/ma15197003), 2022-10-09
Supplement: s1 [file s1]

# Nanoplatforms for irinotecan delivery based on mesoporous silica modified with a natural polysaccharide

Ana-Maria Brezoiu<sup>1</sup>, Ana-Maria Prelipcean<sup>2</sup>, Daniel Lincu<sup>1,3</sup>, Mihaela Deaconu<sup>1</sup>, Eugeniu Vasile<sup>1</sup>, Rodica Tatia<sup>2</sup>, Ana-Maria Seciu-Grama<sup>2</sup>, Cristian Matei<sup>1</sup>, Daniela Berger<sup>1,\*</sup>

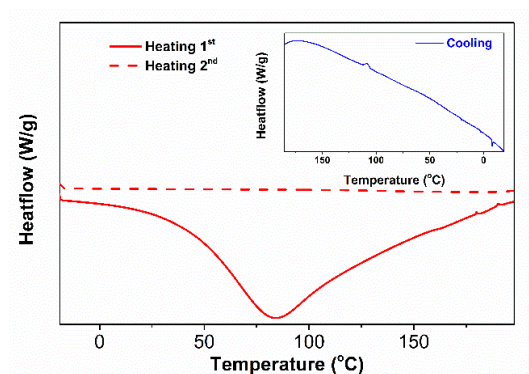

Figure S1. DSC analysis of ulvan extract.

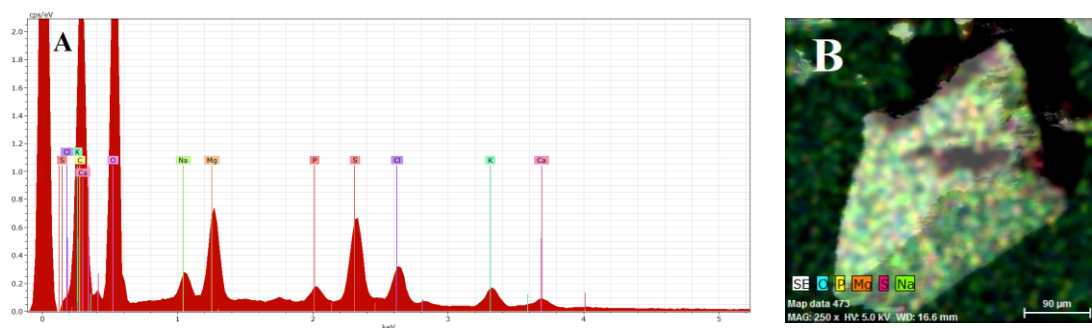

Figure S2. EDX analysis (A) and SEM image with EDX elemental mapping (B) of polysaccharide extract from *Ulva lactuca*.

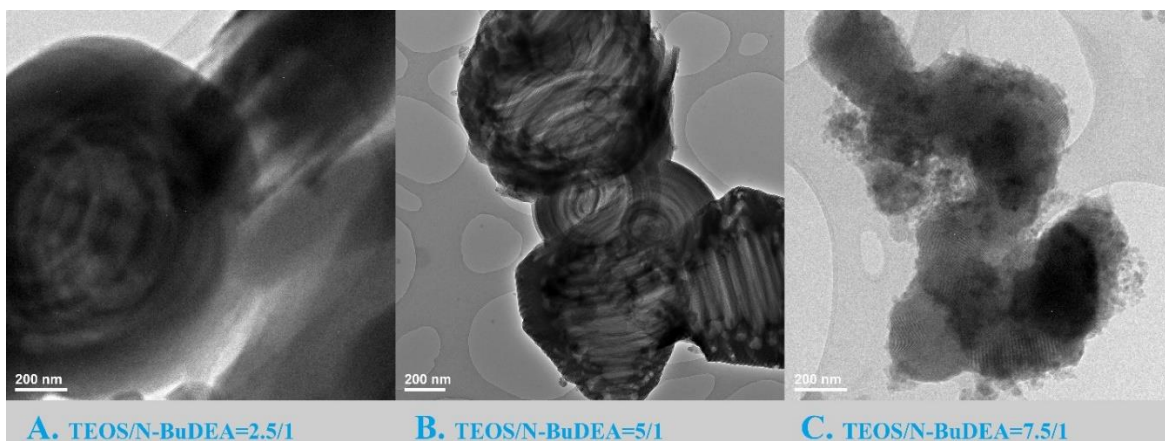

Figure S3. TEM micrographs of MCM-41B-type silica prepared in the presence of different molar ratio of TEOS/N-BUDEA.

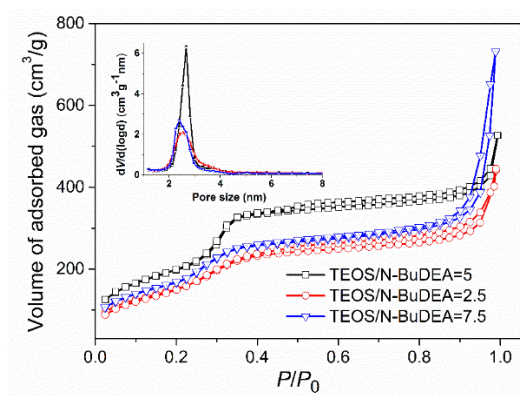

Figure S4. N<sub>2</sub> adsorption-desorption isotherms of MCM-41B-type mesoporous silica prepared in the presence of different molar ratio of TEOS/N-BUDEA (Inset: Pore size distribution curves for MCM-41B-type materials).

Table S1. Textural parameters of pristine and functionalized mesoporous silica materials

| Support              | TEOS/N-BuDEA | $S_{\text{BET}}$ (m <sup>2</sup> /g) | $d_{\text{BJH}}$ (nm) | $V_p$ (cm <sup>3</sup> /g) |
|----------------------|--------------|--------------------------------------|-----------------------|----------------------------|
| MCM41-B              | 5.0          | 728                                  | 2.66                  | 0.64                       |
| MCM41-B (1)          | 2.5          | 595                                  | 2.39                  | 0.75                       |
| MCM41-B (2)          | 7.5          | 613                                  | 2.39                  | 0.44                       |
| MCMB-NH <sub>2</sub> | 5.0          | 491                                  | 2.52                  | 0.61                       |
| SBA-15               | -            | 984                                  | 8.10                  | 1.31                       |
| SBA-NH <sub>2</sub>  | -            | 376                                  | 7.42                  | 0.62                       |

$V_p$  was computed for ( $d_{\text{pore}} < 10$  nm), specific surface area,  $S_{\text{BET}}$ , was determined based on Brunauer-Emmet-Teller method, while the average pore size values were determined by Barrett-Joyner-Halenda model.

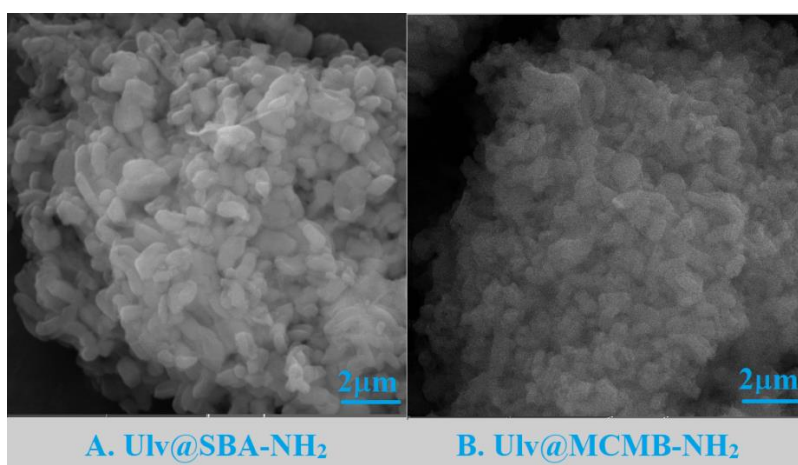

Figure S5. SEM micrographs of Ulv@SBA-NH<sub>2</sub> and Ulv@MCMB-NH<sub>2</sub>.
